# Supplementary material for: 親友関係におけるパーソナリティの関聯性(一般研究 III・4部会 青年問題)
Source: Royal Society of Chemistry journal article supplement (doi:10.1039/c5cp03421c), 1983-10-21
Supplement: c5cp03421c1.pdf [file c5cp03421c1.pdf]

## **Electronic Supplementary Information (ESI)**

### **Novel synthetic route towards monodisperse LaOF:Ln<sup>3+</sup> (Ln = Eu, Tb) hollow spheres with multicolor luminescence properties**

Ruiqing Li,<sup>a</sup> Linlin Li,<sup>a</sup> Yimai Liang,<sup>a</sup> Nannan Zhang,<sup>a</sup> Yali Liu,<sup>a</sup> and Shucai Gan<sup>\*a</sup>

<sup>a</sup> College of Chemistry, Jilin University, Changchun 130026, PR China

\*Corresponding author: E-mail: gansc@jlu.edu.cn

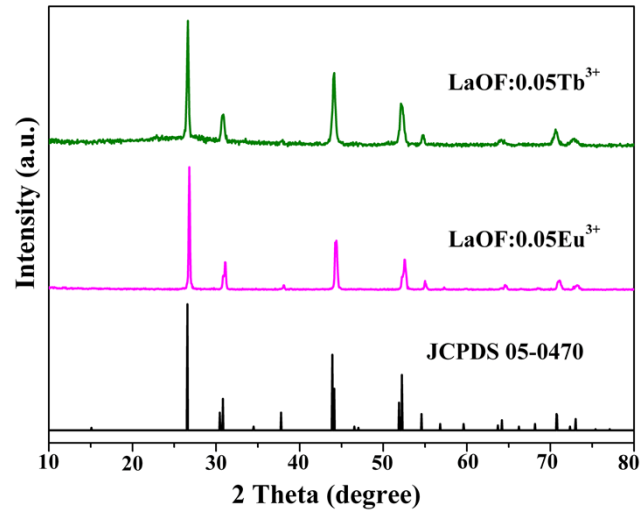

Fig S1 XRD patterns of Eu<sup>3+</sup> and Tb<sup>3+</sup> doped samples, and the standard data of LaOF.

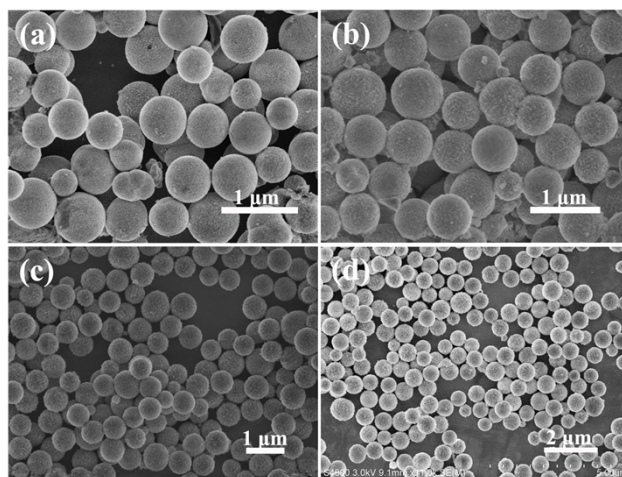

**Fig. S2** SEM images of  $\text{LaCO}_3\text{F}$  spheres at different reaction time: (a) 30 min, (b) 1 h, (c) 2 h, and (d) 3 h.
